# Supplementary material for: Removal of the potent greenhouse gas NF3 by reactions with the atmospheric oxidants O(1D), OH and O3
Source: Royal Society of Chemistry journal article supplement (doi:10.1039/c1cp22230a), 2011-01-01
Supplement: c1cp22230a.pdf [file c1cp22230a.pdf]

## Removal of the potent greenhouse gas $\text{NF}_3$ by reactions with the atmospheric oxidants $\text{O}(^1\text{D})$ , $\text{OH}$ and $\text{O}_3$ .

- Supporting Information -

T. J. Dillon, Luc Vereecken, A. Horowitz, V. Khamaganov and J. N. Crowley

### A. TS12 : $\text{ONF}_3 \leftrightarrow \text{FONF}_2$ isomerisation

A key isomerisation on the  $[\text{ONF}_3]$  potential energy surface (PES) is the 1,2-F-migration, connecting the  $\text{ONF}_3$  and  $\text{FONF}_2$  isomers. It was proposed by Antoniotti and Grandinetti (2002) as the source of the OF radicals observed earlier by Sorokin (1998). However, as discussed in the main paper, the transition state they proposed was characterized by us as the umbrella inversion of the nitrogen centre in  $\text{FONF}_2$ , and hence does not connect to the  $\text{ONF}_3$  global energetic minimum. Despite numerous attempts at finding the true isomerisation transition state, however, we were likewise unable to locate a saddle point corresponding to the 1,2-F-shift.

To elucidate the matter, we characterized the relevant section of the PES, i.e. the migration pathways of a F atom between the nitrogen and oxygen centre. To this end, we performed a large set of constrained geometry optimizations, fixing the position of the F atom relative to the O–N atom bond, but leaving all other degrees of freedom unconstrained. The resulting two-dimensional section of the PES yields the minimum-energy PES for F-migration between the  $\text{ONF}_3$  and  $\text{FONF}_2$  energetic minima. The constrained coordinates are the perpendicular distance of the F atom from the N–O bond axis,  $y = D(\text{NO--F})$ , and the position of the F-atom along that axis,  $x = D(\text{N--F})$ , where we set N equal to position 0.0, and O along the positive side of the axis.

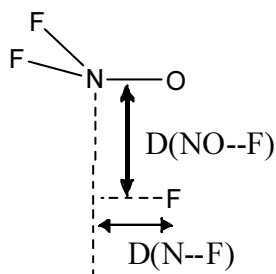

In this coordinate system, the  $\text{F}_3\text{NO}$  minimum is located approximately at  $x = -0.6 \text{ \AA}$ ,  $y = 1.1 \text{ \AA}$ ; while *trans*- $\text{F}_2\text{NOF}$  is located at  $x = 1.7 \text{ \AA}$ ,  $y = 1.4 \text{ \AA}$ . At small  $y$  values, i.e. with small  $D(\text{NO--F})$ , the F-atom is forced into the electron cloud along the N–O bond, causing high

potential energy values. At large separation, i.e. at large negative or positive x-values and/or at large y values, the geometries essentially correspond to the  $F_2NO + F$  dissociation limit. We found that the energetically most favourable F-migration always involved a symmetric position of the two non-migrating F-atoms on the N-atom, one on each side of the N–O–F plane, such that an F-migration would preserve the plane of symmetry. Figure SI-1 shows the resulting potential energy surface cross-section (without ZPE-corrections), with energies in  $\text{kcal mol}^{-1}$  relative to the  $F_3NO$  energetic minimum.

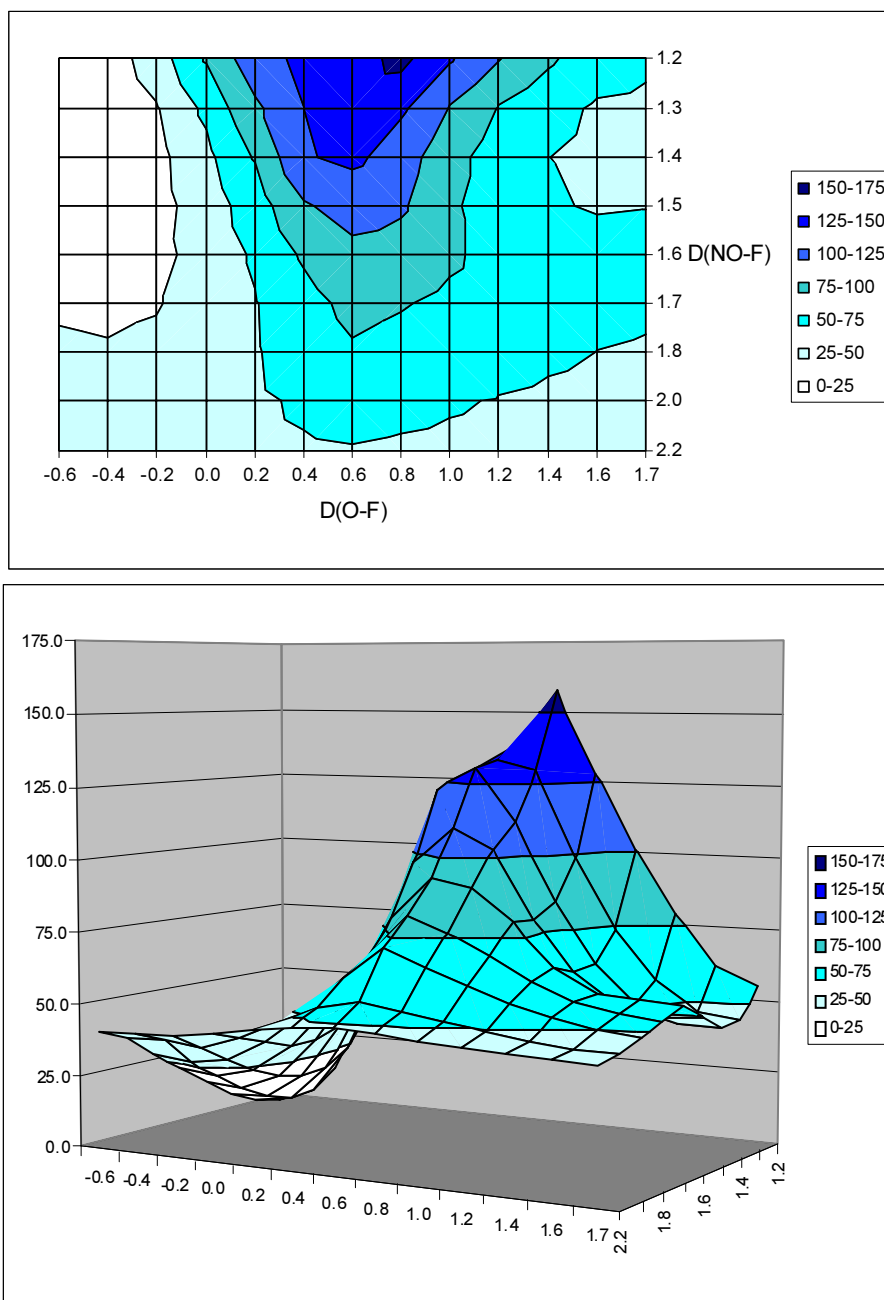

**Fig. SI-1:** Potential energy surface for the migration of an F-atom (kcal/mol)

This potential energy surface differs strongly from the shape one expects to see for a regular isomerisation (an example of which is shown in Fig SI-2 for a 1,2-H-migration) At the position where one would expect to see a saddle point, roughly at  $D(\text{NO-F}) \sim 1.6 \text{ \AA}$  and  $D(\text{O-F}) \sim 0.6 \text{ \AA}$ , the very low dissociation energy to  $\text{F}_2\text{NO} + \text{F}$  lowers the energy at larger F-separation, to the point that the PES shows two convex energy cross-sections: one along the traditional reaction coordinate for F-migration, and another dissociative energy profile perpendicular to it. Hence, no traditional saddle point exists. F-atoms migrating between the N and O centres, then, are energetically and entropically guided towards dissociation. While this does not strictly preclude isomerisation, such a 1-2-F-shift would require a dynamical trajectory that does not follow the lowest-energy path, and hence has a negligible probability compared to the much more favourable dissociation. From this, we conclude that the  $\text{ONF}_3 \leftrightarrow \text{FONF}_2$  isomerisation can not carry a significant reaction flux.

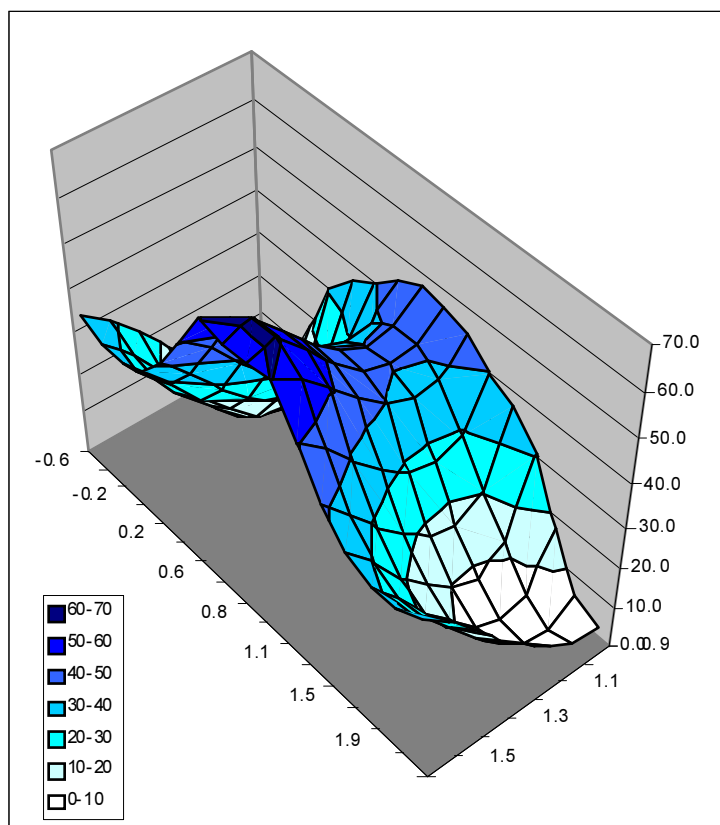

**Fig. SI-2:** Traditional 1,2-migration showing a saddle point on the PES.

## B. Quantum chemical data : [NF3O] PES

F2

--

E(RM052X+HF-M052X/6-311G(d)) (Hartree): -199.52871051  
E(CCSD(T)/Aug-CC-pVTZ) (Hartree): -199.31211286  
E(CCSD/Aug-CC-pVTZ) (Hartree): -199.29331651  
E(MP2/Aug-CC-pVTZ) (Hartree): -199.29013258  
E(MP3/Aug-CC-pVTZ) (Hartree): -199.28824501  
E(RHF/Aug-CC-pVTZ) (Hartree): -198.75941981  
Point group : D\*H  
Electronic state : 1-SGG  
Cartesian coordinates (Angs):  
F 0.000000 0.000000 0.683995  
F 0.000000 0.000000 -0.683995  
Rotational constants (GHz): 0.0000000 28.4292083 28.4292083  
Vibrational harmonic frequencies (cm-1):  
1142.1988 ( SGG)  
Zero-point correction (Hartree): 0.002602

F2NOF.cis

-----

E(RM052X+HF-M052X/6-311G(d)) (Hartree): -429.25864308  
E(CCSD(T)/Aug-CC-pVTZ) (Hartree): -428.74253268  
E(CCSD/Aug-CC-pVTZ) (Hartree): -428.69061181  
E(MP2/Aug-CC-pVTZ) (Hartree): -428.69050821  
E(MP3/Aug-CC-pVTZ) (Hartree): -428.67887550  
E(RHF/Aug-CC-pVTZ) (Hartree): -427.45565269  
Electronic state : 1-A  
Cartesian coordinates (Angs):  
N 0.541889 0.000124 0.525015  
F 0.843563 -1.060528 -0.276818  
F 0.841210 1.061979 -0.275516  
O -0.750719 -0.001642 0.737549  
F -1.438937 -0.000088 -0.511610  
Rotational constants (GHz): 7.9950600 5.0616800 4.1349500  
Vibrational harmonic frequencies (cm-1):  
215.1369 304.9891 559.8684  
594.4158 814.6842 855.9949  
987.4420 1032.6566 1119.4640  
Zero-point correction (Hartree): 0.014773

F2NOF.trans

-----

E(RM052X+HF-M052X/6-311G(d)) (Hartree): -429.24814561  
E(CCSD(T)/Aug-CC-pVTZ) (Hartree): -428.73364673  
E(CCSD/Aug-CC-pVTZ) (Hartree): -428.68305320  
E(MP2/Aug-CC-pVTZ) (Hartree): -428.68110123  
E(MP3/Aug-CC-pVTZ) (Hartree): -428.67179830  
E(RHF/Aug-CC-pVTZ) (Hartree): -427.45077203  
Electronic state : 1-A  
Cartesian coordinates (Angs):  
N -0.325478 0.000185 -0.372684  
F -1.098709 -1.056755 0.009645  
F -1.096490 1.057891 0.010246  
O 0.684998 -0.001271 0.554595  
F 1.839461 -0.000151 -0.222999  
Rotational constants (GHz): 10.0495400 3.9837900 3.1287800  
Vibrational harmonic frequencies (cm-1):  
93.4142 431.3536 515.0344  
519.2761 663.7778 900.7150  
1019.8733 1078.6624 1140.8483  
Zero-point correction (Hartree): 0.014496

F

-

E(UM052X+HF-M052X/6-311G(d)) (Hartree): -99.74403582  
E(CCSD(T)/Aug-CC-pVTZ) (Hartree): -99.62782704  
E(CCSD/Aug-CC-pVTZ) (Hartree): -99.62345241  
E(MP2/Aug-CC-pVTZ) (Hartree): -99.61210618  
E(MP3/Aug-CC-pVTZ) (Hartree): -99.62216846  
E(PMP2/Aug-CC-pVTZ) (Hartree): -99.61371825  
E(PMP3/Aug-CC-pVTZ) (Hartree): -99.62300590

E(PUHF/Aug-CC-pVTZ) (Hartree): -99.41002320  
E(UHF/Aug-CC-pVTZ) (Hartree): -99.40687935  
Point group : OH  
Cartesian coordinates (Angs):  
F 0.000000 0.000000 0.000000  
Zero-point correction (Hartree): 0.000000

FNOF

----

E(UM052X+HF-M052X/6-311G(d)) (Hartree): -329.41791481  
E(CCSD(T)/Aug-CC-pVTZ) (Hartree): -329.01444620  
E(CCSD/Aug-CC-pVTZ) (Hartree): -328.97517376  
E(MP2/Aug-CC-pVTZ) (Hartree): -328.96460312  
E(MP3/Aug-CC-pVTZ) (Hartree): -328.96274797  
E(PMP2/Aug-CC-pVTZ) (Hartree): -328.96769265  
E(PMP3/Aug-CC-pVTZ) (Hartree): -328.96459244  
E(PUHF/Aug-CC-pVTZ) (Hartree): -328.03592873  
E(UHF/Aug-CC-pVTZ) (Hartree): -328.03112862  
Electronic state : 2-A  
Cartesian coordinates (Angs):  
N -0.467393 0.557214 0.000388  
F -1.630590 -0.111666 -0.000321  
O 0.400058 -0.497461 0.000375  
F 1.638511 0.120465 -0.000314  
Rotational constants (GHz): 57.3177400 4.7170300 4.3583500  
Vibrational harmonic frequencies (cm-1):  
100.8132 394.0223 579.5963  
1041.9431 1116.7994 1194.4603  
Zero-point correction (Hartree): 0.010087

FNO

----

E(RM052X+HF-M052X/6-311G(d)) (Hartree): -229.73628257  
E(CCSD(T)/Aug-CC-pVTZ) (Hartree): -229.44932036  
E(CCSD/Aug-CC-pVTZ) (Hartree): -229.41522649  
E(MP2/Aug-CC-pVTZ) (Hartree): -229.42354957  
E(MP3/Aug-CC-pVTZ) (Hartree): -229.40460930  
E(RHF/Aug-CC-pVTZ) (Hartree): -228.71458404  
Point group : CS  
Electronic state : 1-A'  
Cartesian coordinates (Angs):  
N 0.000000 0.548617 0.000000  
F -0.941653 -0.572852 0.000000  
O 1.059359 0.164418 0.000000  
Rotational constants (GHz): 98.1245100 12.4777200 11.0700300  
Vibrational harmonic frequencies (cm-1):  
602.7788 ( A') 867.0224 ( A') 2019.9976 ( A')  
Zero-point correction (Hartree): 0.007950

NF2F--O

-----

E(RM052X+HF-M052X/6-311G(d)) (Hartree): -429.12903856  
E(CCSD(T)/Aug-CC-pVTZ) (Hartree): -428.61887100  
E(CCSD/Aug-CC-pVTZ) (Hartree): -428.56851243  
E(MP2/Aug-CC-pVTZ) (Hartree): -428.54690333  
E(MP3/Aug-CC-pVTZ) (Hartree): -428.54954872  
E(RHF/Aug-CC-pVTZ) (Hartree): -427.36254426  
Electronic state : 1-A  
Cartesian coordinates (Angs):  
N 0.725577 0.000000 0.469905  
F -0.652636 -0.000005 0.815728  
F 0.804192 -1.045380 -0.348569  
F 0.804187 1.045384 -0.348564  
O -1.710092 0.000001 -0.544586  
Rotational constants (GHz): 7.5884800 4.5164900 3.9376400  
Vibrational harmonic frequencies (cm-1):  
114.6648 211.3510 320.6803  
507.1244 540.5630 713.5456  
841.6801 1080.2493 1153.4139  
Zero-point correction (Hartree): 0.012492

NF2F--O triplet, single point calculation on singlet geometry

-----

E(UM052X+HF-M052X/6-311G(d)) (Hartree): -429.16867180  
E(CCSD(T)/Aug-CC-pVTZ) (Hartree): -428.64772753  
E(CCSD/Aug-CC-pVTZ) (Hartree): -428.60347858  
E(MP2/Aug-CC-pVTZ) (Hartree): -428.58717908  
E(MP3/Aug-CC-pVTZ) (Hartree): -428.59111096

E(PMP2/Aug-CC-pVTZ) (Hartree): -428.58940770  
E(PMP3/Aug-CC-pVTZ) (Hartree): -428.59250013  
E(PUHF/Aug-CC-pVTZ) (Hartree): -427.44169212  
E(UHF/Aug-CC-pVTZ) (Hartree): -427.43807729  
Electronic state : 3-A  
Cartesian coordinates (Angs):  
N -0.390943 0.000026 -0.408300  
F 0.625873 -0.000491 0.576156  
F -1.124866 -1.046551 -0.011671  
F -1.124146 1.046994 -0.011381  
O 2.168106 0.000031 -0.264981  
Rotational constants (GHz): 9.8325200 3.5452300 2.8974500  
Vibrational harmonic frequencies (cm-1):  
-243.9143 -225.2137 475.8661  
507.6272 652.6151 831.6636  
895.7663 1066.1087 1147.6096  
Zero-point correction (Hartree): 0.012706

NF2F--O triplet

-----

E(UM052X+HF-M052X/6-311G(d)) (Hartree): -429.21433683  
E(CCSD(T)/Aug-CC-pVTZ) (Hartree): -428.69333761  
E(CCSD/Aug-CC-pVTZ) (Hartree): -428.65111526  
E(MP2/Aug-CC-pVTZ) (Hartree): -428.63427505  
E(MP3/Aug-CC-pVTZ) (Hartree): -428.63988876  
E(PMP2/Aug-CC-pVTZ) (Hartree): -428.63616385  
E(PMP3/Aug-CC-pVTZ) (Hartree): -428.64101401  
E(PUHF/Aug-CC-pVTZ) (Hartree): -427.50047052  
E(UHF/Aug-CC-pVTZ) (Hartree): -427.49736557  
Electronic state : 3-A  
Cartesian coordinates (Angs):  
N 0.262497 0.000010 -0.244111  
F -0.156963 -0.001260 1.046894  
F 1.110892 1.055496 -0.268578  
F 1.112375 -1.054252 -0.270150  
O -2.554278 0.000008 -0.358090  
Rotational constants (GHz): 7.3522500 2.8209100 2.5919600  
Vibrational harmonic frequencies (cm-1):  
47.6395 56.5535 99.3702  
534.3438 534.5828 704.9035  
1022.1449 1027.7146 1127.6637  
Zero-point correction (Hartree): 0.011744

NF2

---

E(UM052X+HF-M052X/6-311G(d)) (Hartree): -254.30519806  
E(CCSD(T)/Aug-CC-pVTZ) (Hartree): -253.99247463  
E(CCSD/Aug-CC-pVTZ) (Hartree): -253.96548109  
E(MP2/Aug-CC-pVTZ) (Hartree): -253.95734430  
E(MP3/Aug-CC-pVTZ) (Hartree): -253.95555789  
E(PMP2/Aug-CC-pVTZ) (Hartree): -253.96027005  
E(PMP3/Aug-CC-pVTZ) (Hartree): -253.95726496  
E(PUHF/Aug-CC-pVTZ) (Hartree): -253.27053582  
E(UHF/Aug-CC-pVTZ) (Hartree): -253.26591919  
Point group : C2V  
Electronic state : 2-B1  
Cartesian coordinates (Angs):  
N 0.000000 0.000000 0.596577  
F 0.000000 1.046978 -0.232002  
F 0.000000 -1.046978 -0.232002  
Rotational constants (GHz): 71.9416600 12.1337500 10.3826100  
Vibrational harmonic frequencies (cm-1):  
621.2610 1041.9603 1183.0092  
Zero-point correction (Hartree): 0.006484

NF2O

----

E(UM052X+HF-M052X/6-311G(d)) (Hartree): -329.49760098  
E(CCSD(T)/Aug-CC-pVTZ) (Hartree): -329.08580001  
E(CCSD/Aug-CC-pVTZ) (Hartree): -329.04422785  
E(MP2/Aug-CC-pVTZ) (Hartree): -329.04101350  
E(MP3/Aug-CC-pVTZ) (Hartree): -329.02988785  
E(PMP2/Aug-CC-pVTZ) (Hartree): -329.04776967  
E(PMP3/Aug-CC-pVTZ) (Hartree): -329.03398296  
E(PUHF/Aug-CC-pVTZ) (Hartree): -328.09960008  
E(UHF/Aug-CC-pVTZ) (Hartree): -328.09043836  
Electronic state : 2-A

Cartesian coordinates (Angs):  
N -0.000603 0.170417 0.287812  
O -0.003003 1.273956 -0.106060  
F -1.088422 -0.634983 -0.064814  
F 1.091560 -0.629969 -0.064764  
Rotational constants (GHz): 11.7417400 10.8351600 5.8300100  
Vibrational harmonic frequencies (cm-1):  
490.2780 532.3951 683.5391  
837.9813 956.5710 1633.0631  
Zero-point correction (Hartree): 0.011696

NF3

---

E(RM052X+HF-M052X/6-311G(d)) (Hartree): -354.13611028  
E(CCSD(T)/Aug-CC-pVTZ) (Hartree): -353.71361080  
E(CCSD/Aug-CC-pVTZ) (Hartree): -353.67511638  
E(MP2/Aug-CC-pVTZ) (Hartree): -353.67451342  
E(MP3/Aug-CC-pVTZ) (Hartree): -353.66566844  
E(RHF/Aug-CC-pVTZ) (Hartree): -352.68589143  
Point group : CS  
Electronic state : 1-A'  
Cartesian coordinates (Angs):  
N 0.338172 0.330159 0.000000  
F -0.939368 0.784832 0.000000  
F 0.338172 -0.520811 1.055057  
F 0.338172 -0.520811 -1.055057  
Rotational constants (GHz): 10.9284500 10.9206100 5.9766700  
Vibrational harmonic frequencies (cm-1):  
535.1475 ( A'') 535.8508 ( A') 707.2625 ( A')  
1022.2475 ( A'') 1023.3765 ( A') 1125.0404 ( A')  
Zero-point correction (Hartree): 0.011274

NF3O

----

E(RM052X+HF-M052X/6-311G(d)) (Hartree): -429.31990448  
E(CCSD(T)/Aug-CC-pVTZ) (Hartree): -428.79718475  
E(CCSD/Aug-CC-pVTZ) (Hartree): -428.74160543  
E(MP2/Aug-CC-pVTZ) (Hartree): -428.76102447  
E(MP3/Aug-CC-pVTZ) (Hartree): -428.72923863  
E(RHF/Aug-CC-pVTZ) (Hartree): -427.49472946  
Point group : CS  
Electronic state : 1-A'  
Cartesian coordinates (Angs):  
N 0.063327 0.181075 0.000000  
F -1.327271 -0.012220 0.000000  
F 0.442390 -0.628579 1.081606  
F 0.442390 -0.628579 -1.081606  
O 0.442390 1.269611 0.000000  
Rotational constants (GHz): 5.9245400 5.9227900 5.6830200  
Vibrational harmonic frequencies (cm-1):  
440.0665 ( A') 441.8249 ( A'') 604.0390 ( A'')  
604.9817 ( A') 610.3034 ( A') 858.1856 ( A')  
991.4868 ( A'') 994.4938 ( A') 1818.5440 ( A')  
Zero-point correction (Hartree): 0.016776

NO

--

E(UM052X+HF-M052X/6-311G(d)) (Hartree): -129.90615892  
E(CCSD(T)/Aug-CC-pVTZ) (Hartree): -129.72549812  
E(CCSD/Aug-CC-pVTZ) (Hartree): -129.70650051  
E(MP2/Aug-CC-pVTZ) (Hartree): -129.70248692  
E(MP3/Aug-CC-pVTZ) (Hartree): -129.69857676  
E(PMP2/Aug-CC-pVTZ) (Hartree): -129.70669919  
E(PMP3/Aug-CC-pVTZ) (Hartree): -129.70117402  
E(PUHF/Aug-CC-pVTZ) (Hartree): -129.30587777  
E(UHF/Aug-CC-pVTZ) (Hartree): -129.30009789  
Point group : C\*v  
Cartesian coordinates (Angs):  
N 0.000000 0.000000 -0.606204  
O 0.000000 0.000000 0.530429  
Rotational constants (GHz): 0.0000000 52.3918563 52.3918563  
Vibrational harmonic frequencies (cm-1):  
2109.9298 ( SG)  
Zero-point correction (Hartree): 0.004807

Old

---

E(RM052X+HF-M052X/6-311G(d)) (Hartree): -74.97444856

E(CCSD(T)/Aug-CC-pVTZ) (Hartree): -74.89795002  
E(CCSD/Aug-CC-pVTZ) (Hartree): -74.88723748  
E(MP2/Aug-CC-pVTZ) (Hartree): -74.85397838  
E(MP3/Aug-CC-pVTZ) (Hartree): -74.87273635  
E(RHF/Aug-CC-pVTZ) (Hartree): -74.68550330  
Point group : OH  
Cartesian coordinates (Angs):  
O 0.000000 0.000000 0.000000  
Zero-point correction (Hartree): 0.000000

O3P

---  
E(UM052X+HF-M052X/6-311G(d)) (Hartree): -75.07642524  
E(CCSD(T)/Aug-CC-pVTZ) (Hartree): -74.97895232  
E(CCSD/Aug-CC-pVTZ) (Hartree): -74.97552237  
E(MP2/Aug-CC-pVTZ) (Hartree): -74.95929413  
E(MP3/Aug-CC-pVTZ) (Hartree): -74.97376768  
E(PMP2/Aug-CC-pVTZ) (Hartree): -74.96116267  
E(PMP3/Aug-CC-pVTZ) (Hartree): -74.97487266  
E(PUHF/Aug-CC-pVTZ) (Hartree): -74.81606234  
E(UHF/Aug-CC-pVTZ) (Hartree): -74.81298221  
Point group : OH  
Cartesian coordinates (Angs):  
O 0.000000 0.000000 0.000000  
Zero-point correction (Hartree): 0.000000

OF

--  
E(UM052X+HF-M052X/6-311G(d)) (Hartree): -174.89297393  
E(CCSD(T)/Aug-CC-pVTZ) (Hartree): -174.68434009  
E(CCSD/Aug-CC-pVTZ) (Hartree): -174.66695761  
E(MP2/Aug-CC-pVTZ) (Hartree): -174.65341831  
E(MP3/Aug-CC-pVTZ) (Hartree): -174.65826525  
E(PMP2/Aug-CC-pVTZ) (Hartree): -174.65655860  
E(PMP3/Aug-CC-pVTZ) (Hartree): -174.66025146  
E(PUHF/Aug-CC-pVTZ) (Hartree): -174.20086459  
E(UHF/Aug-CC-pVTZ) (Hartree): -174.19625016  
Point group : C\*v  
Cartesian coordinates (Angs):  
O 0.000000 0.000000 -0.703693  
F 0.000000 0.000000 0.625505  
Rotational constants (GHz): 0.0000000 32.9400145 32.9400145  
Vibrational harmonic frequencies (cm-1):  
1178.2151 ( SG)  
Zero-point correction (Hartree): 0.002684

TS\_F2NO\_F\_diss.t

-----  
E(UM052X+HF-M/6-311G(d)) (Hartree): -429.22545536  
E(CCSD(T)/Aug-CC-pVTZ) (Hartree): -428.70983428  
E(CCSD/Aug-CC-pVTZ) (Hartree): -428.65604214  
E(MP2/Aug-CC-pVTZ) (Hartree): -428.61713614  
E(MP3/Aug-CC-pVTZ) (Hartree): -428.62189987  
E(PMP2/Aug-CC-pVTZ) (Hartree): -428.66825916  
E(PMP3/Aug-CC-pVTZ) (Hartree): -428.66966972  
E(PUHF/Aug-CC-pVTZ) (Hartree): -427.50801487  
E(UHF/Aug-CC-pVTZ) (Hartree): -427.45495132  
Electronic state : 1-A  
Cartesian coordinates (Angs):  
N 0.308610 0.000000 -0.207700  
F 1.137875 1.076831 -0.061630  
F 1.137876 -1.076831 -0.061630  
O -0.602291 0.000000 0.615626  
F -1.980412 0.000000 -0.262418  
Rotational constants (GHz): 9.6861300 3.6368400 2.8894500  
Vibrational harmonic frequencies (cm-1):  
-1025.0691 159.0053 313.1903  
527.0594 570.3455 706.8439  
926.0522 1064.5954 1208.4926  
Zero-point correction (Hartree): 0.012474

TS\_F2NOF\_inplane

-----  
E(UM052X+HF-M052X/6-311G(d)) (Hartree): -429.21290556  
E(CCSD(T)/Aug-CC-pVTZ) (Hartree): -428.69709662  
E(CCSD/Aug-CC-pVTZ) (Hartree): -428.64336389  
E(MP2/Aug-CC-pVTZ) (Hartree): -428.61775034  
E(MP3/Aug-CC-pVTZ) (Hartree): -428.61463721



E(PMP2/Aug-CC-pVTZ) (Hartree): -428.66217422  
E(PMP3/Aug-CC-pVTZ) (Hartree): -428.65670240  
E(PUHF/Aug-CC-pVTZ) (Hartree): -427.48178562  
E(RHF/Aug-CC-pVTZ) (Hartree): -427.38379756  
E(UHF/Aug-CC-pVTZ) (Hartree): -427.43611816  
Electronic state : 1-A  
Cartesian coordinates (Angs):  
N 0.353190 0.000001 0.058950  
F 1.099582 1.088931 -0.148506  
F 1.099619 -1.088917 -0.148504  
O -0.633141 -0.000001 0.695783  
F -1.911112 -0.000013 -0.367315  
Rotational constants (GHz): 8.9858200 3.7525200 2.9984700  
Vibrational harmonic frequencies (cm-1):  
-438.3963 207.3854 331.7575  
542.1869 597.1110 615.3021  
930.2623 1230.1045 1654.3843  
Zero-point correction (Hartree): 0.013916

TS\_F2NOF\_introt

-----

E(RM052X+HF-M052X/6-311G(d)) (Hartree): -429.23518830  
E(CCS(D)T)/Aug-CC-pVTZ) (Hartree): -428.72197987  
E(CCS(D)Aug-CC-pVTZ) (Hartree): -428.67010095  
E(MP2/Aug-CC-pVTZ) (Hartree): -428.66853323  
E(MP3/Aug-CC-pVTZ) (Hartree): -428.65815046  
E(PMP2/Aug-CC-pVTZ) (Hartree): -428.66853323  
E(PMP3/Aug-CC-pVTZ) (Hartree): -428.65815046  
E(PUHF/Aug-CC-pVTZ) (Hartree): -427.43390810  
E(RHF/Aug-CC-pVTZ) (Hartree): -427.43362307  
E(UHF/Aug-CC-pVTZ) (Hartree): -427.43390810  
Electronic state : 1-A  
Cartesian coordinates (Angs):  
N -0.534947 0.010940 0.516995  
F -0.322681 1.218769 -0.040438  
F -1.469480 -0.539747 -0.303667  
O 0.615737 -0.803624 0.159130  
F 1.660909 0.026803 -0.199451  
Rotational constants (GHz): 9.9535100 4.5055000 3.3787000  
Vibrational harmonic frequencies (cm-1):  
-201.6816 363.7440 468.0319  
566.5565 707.2629 843.6426  
1037.6479 1092.3714 1121.4986  
Zero-point correction (Hartree): 0.014126

TS\_FNOF\_introt

-----

E(UM052X+HF-M052X/6-311G(d)) (Hartree): -329.41677294  
E(CCS(D)T)/Aug-CC-pVTZ) (Hartree): -329.01533096  
E(CCS(D)Aug-CC-pVTZ) (Hartree): -328.97429047  
E(MP2/Aug-CC-pVTZ) (Hartree): -328.94341238  
E(MP3/Aug-CC-pVTZ) (Hartree): -328.94733804  
E(PMP2/Aug-CC-pVTZ) (Hartree): -328.96184034  
E(PMP3/Aug-CC-pVTZ) (Hartree): -328.96083491  
E(PUHF/Aug-CC-pVTZ) (Hartree): -328.05065363  
E(UHF/Aug-CC-pVTZ) (Hartree): -328.02936777  
Electronic state : 2-A  
Cartesian coordinates (Angs):  
N 0.482380 -0.466465 0.324494  
F 1.586545 0.073393 -0.245585  
O -0.399936 0.488159 0.239647  
F -1.606230 -0.144506 -0.219819  
Rotational constants (GHz): 42.7927200 4.7183900 4.5938900  
Vibrational harmonic frequencies (cm-1):  
-227.8637 319.6645 493.1000  
684.3756 998.7852 1129.2547  
Zero-point correction (Hartree): 0.008259

TS\_Fabstraction

-----

E(UM052X+HF-M/6-311G(d)) (Hartree): -429.12675839  
E(CCS(D)T)/Aug-CC-pVTZ) (Hartree): -428.61892664  
E(CCS(D)Aug-CC-pVTZ) (Hartree): -428.56024515  
E(MP2/Aug-CC-pVTZ) (Hartree): -428.51313407  
E(MP3/Aug-CC-pVTZ) (Hartree): -428.51488928  
E(PMP2/Aug-CC-pVTZ) (Hartree): -428.57133959  
E(PMP3/Aug-CC-pVTZ) (Hartree): -428.56909148

E(PUHF/Aug-CC-pVTZ) (Hartree): -427.39762204  
E(RHF/Aug-CC-pVTZ) (Hartree): -427.32857339  
E(UHF/Aug-CC-pVTZ) (Hartree): -427.33769088  
Electronic state : 1-A  
Cartesian coordinates (Angs):  
N -0.736285 -0.000001 0.508781  
F 0.870336 -0.000010 0.707888  
F -0.840052 1.028800 -0.290488  
F -0.840064 -1.028792 -0.290500  
O 1.555251 0.000003 -0.587945  
Rotational constants (GHz): 8.1410000 4.6213400 3.9571500  
Vibrational harmonic frequencies (cm-1):  
-296.1287 63.6061 264.9961  
415.5559 578.0771 720.4859  
739.7961 1111.2883 1189.6825  
Zero-point correction (Hartree): 0.011581

TS\_NF3\_O\_insertion  
-----

E(RM052X+HF-M052X/6-311G(d)) (Hartree): -429.09068333  
E(CCSD(T)/Aug-CC-pVTZ) (Hartree): -428.59053519  
E(CCSD/Aug-CC-pVTZ) (Hartree): -428.52708267  
E(MP2/Aug-CC-pVTZ) (Hartree): -428.52215762  
E(MP3/Aug-CC-pVTZ) (Hartree): -428.50142235  
E(RHF/Aug-CC-pVTZ) (Hartree): -427.28736495  
Electronic state : 1-A  
Cartesian coordinates (Angs):  
N 0.412559 0.157243 -0.478386  
F 0.587401 1.127168 0.349956  
F 1.354335 -0.703502 -0.117911  
O -1.621320 0.292908 -0.313162  
F -0.821442 -0.806329 0.418399  
Rotational constants (GHz): 8.6700300 4.6227800 3.4556500  
Vibrational harmonic frequencies (cm-1):  
-926.5791 158.1537 346.8836  
383.9122 530.0336 688.3672  
791.2940 981.1482 1187.8076  
Zero-point correction (Hartree): 0.011545

TS\_umbrella  
-----

E(UM052X+HF-M/6-311G(d)) (Hartree): -429.22316036  
E(CCSD(T)/Aug-CC-pVTZ) (Hartree): -428.69600173  
E(CCSD/Aug-CC-pVTZ) (Hartree): -428.64477207  
E(MP2/Aug-CC-pVTZ) (Hartree): -428.61990337  
E(MP3/Aug-CC-pVTZ) (Hartree): -428.62010635  
E(PMP2/Aug-CC-pVTZ) (Hartree): -428.65830482  
E(PMP3/Aug-CC-pVTZ) (Hartree): -428.65739766  
E(PUHF/Aug-CC-pVTZ) (Hartree): -427.49441497  
E(RHF/Aug-CC-pVTZ) (Hartree): -427.37189986  
E(UHF/Aug-CC-pVTZ) (Hartree): -427.45539515  
Point group : CS  
Electronic state : 1-A'  
Cartesian coordinates (Angs):  
N 0.136530 0.433298 0.000000  
F -0.285965 1.088317 1.081828  
F -0.285965 1.088317 -1.081828  
O 0.845668 -0.508636 0.000000  
F -0.285965 -2.061523 0.000000  
Rotational constants (GHz): 8.3617400 3.3948900 2.8493800  
Vibrational harmonic frequencies (cm-1):  
-773.4917 ( A') 118.3653 ( A'') 170.7769 ( A')  
302.8790 ( A') 547.0110 ( A') 594.9430 ( A'')  
920.7337 ( A') 1209.5695 ( A'') 1708.1735 ( A')  
Zero-point correction (Hartree): 0.012695

## C. Quantum chemical data : [NF3OH] PES

F3N--OH

-----  
E(UM052X+HF-M/6-311G(d)) (Hartree): -429.87252631  
Electronic state : 2-A  
Cartesian coordinates (Angs):  
N -0.501085 0.007581 -0.402073  
F 0.047032 -0.951948 0.399450  
F -1.829007 -0.196509 -0.204750  
F -0.277442 1.132540 0.308159  
O 2.422782 0.114388 -0.195772  
H 2.660100 -0.824922 -0.145039  
Rotational constants (GHz): 9.7771400 2.8407000 2.3776600  
Vibrational harmonic frequencies (cm-1):  
52.0131 79.9141 122.5570  
162.3425 232.5491 535.2833  
536.1811 703.8598 1006.4474  
1026.6220 1125.8084 3760.4740  
Zero-point correction (Hartree): 0.021287

NF3--HO

-----  
E(UM052X+HF-M/6-311G(d)) (Hartree): -429.87311135  
E(CCSD(T)/Aug-CC-pVTZ) (Hartree): -429.36014981  
E(CCSD/Aug-CC-pVTZ) (Hartree): -429.31524919  
E(MP2/Aug-CC-pVTZ) (Hartree): -429.30125427  
E(MP3/Aug-CC-pVTZ) (Hartree): -429.30399811  
E(PMP2/Aug-CC-pVTZ) (Hartree): -429.30325238  
E(PMP3/Aug-CC-pVTZ) (Hartree): -429.30514567  
E(PUHF/Aug-CC-pVTZ) (Hartree): -428.10841423  
E(UHF/Aug-CC-pVTZ) (Hartree): -428.10504057  
Electronic state : 2-A  
Cartesian coordinates (Angs):  
N 1.025840 0.020471 0.158629  
F 0.447090 1.205650 -0.190767  
F 0.187303 -0.423637 1.127856  
F 0.714115 -0.770981 -0.885233  
H -1.985239 0.801919 -0.000991  
O -2.166528 -0.130563 -0.197015  
Rotational constants (GHz): 6.0222900 3.4016800 3.3456800  
Vibrational harmonic frequencies (cm-1):  
72.6390 83.9613 111.8139  
159.2218 274.6754 532.8466  
535.0427 704.0463 1007.4535  
1034.1954 1125.3231 3760.0587  
Zero-point correction (Hartree): 0.021418

F

-  
E(UM052X+HF-M052X/6-311G(d)) (Hartree): -99.74403582  
E(CCSD(T)/Aug-CC-pVTZ) (Hartree): -99.62782704  
E(CCSD/Aug-CC-pVTZ) (Hartree): -99.62345241  
E(MP2/Aug-CC-pVTZ) (Hartree): -99.61210618  
E(MP3/Aug-CC-pVTZ) (Hartree): -99.62216846  
E(PMP2/Aug-CC-pVTZ) (Hartree): -99.61371825  
E(PMP3/Aug-CC-pVTZ) (Hartree): -99.62300590  
E(PUHF/Aug-CC-pVTZ) (Hartree): -99.41002320  
E(UHF/Aug-CC-pVTZ) (Hartree): -99.40687935  
Point group : OH  
Cartesian coordinates (Angs):  
F 0.000000 0.000000 0.000000  
Zero-point correction (Hartree): 0.000000

HF

--  
E(RM052X+HF-M052X/6-311G(d)) (Hartree): -100.44761114  
E(CCSD(T)/Aug-CC-pVTZ) (Hartree): -100.34957663  
E(CCSD/Aug-CC-pVTZ) (Hartree): -100.34203864  
E(MP2/Aug-CC-pVTZ) (Hartree): -100.34088926  
E(MP3/Aug-CC-pVTZ) (Hartree): -100.33968904  
E(RHF/Aug-CC-pVTZ) (Hartree): -100.06089639  
Point group : C<sub>v</sub>

Electronic state : 1-SG  
Cartesian coordinates (Angs):  
F 0.000000 0.000000 0.092065  
H 0.000000 0.000000 -0.828581  
Rotational constants (GHz): 0.0000000 623.0096811 623.0096811  
Vibrational harmonic frequencies (cm-1):  
4092.4976 ( SG)  
Zero-point correction (Hartree): 0.009323

#### HNF2O

-----

E(RM052X+HF-M052X/6-311G(d)) (Hartree): -330.12011859  
E(CCSD(T)/Aug-CC-pVTZ) (Hartree): -329.71712267  
E(CCSD/Aug-CC-pVTZ) (Hartree): -329.67132597  
E(MP2/Aug-CC-pVTZ) (Hartree): -329.68521128  
E(MP3/Aug-CC-pVTZ) (Hartree): -329.65985002  
E(RHF/Aug-CC-pVTZ) (Hartree): -328.67003081  
Electronic state : 1-A  
Cartesian coordinates (Angs):  
N 0.003930 0.205835 0.294535  
F -1.115667 -0.632817 -0.109869  
F 1.092574 -0.670233 -0.109806  
O 0.022551 1.278988 -0.174373  
H -0.000083 0.054709 1.310315  
Rotational constants (GHz): 10.8142300 10.0690600 5.6649800  
Vibrational harmonic frequencies (cm-1):  
455.5595 467.1756 675.5838  
818.5889 940.3641 1348.2524  
1502.6878 1716.1228 3378.6038  
Zero-point correction (Hartree): 0.025750

#### HOF

---

E(RM052X+HF-M052X/6-311G(d)) (Hartree): -175.54764683  
E(CCSD(T)/Aug-CC-pVTZ) (Hartree): -175.35031507  
E(CCSD/Aug-CC-pVTZ) (Hartree): -175.33122445  
E(MP2/Aug-CC-pVTZ) (Hartree): -175.32616108  
E(MP3/Aug-CC-pVTZ) (Hartree): -175.32620468  
E(RHF/Aug-CC-pVTZ) (Hartree): -174.80996464  
Point group : CS  
Electronic state : 1-A'  
Cartesian coordinates (Angs):  
O 0.052899 0.690550 0.000000  
F 0.052899 -0.708591 0.000000  
H -0.899285 0.852919 0.000000  
Rotational constants (GHz): 598.3419200 28.2717300 26.9961600  
Vibrational harmonic frequencies (cm-1):  
1084.8722 ( A') 1493.4869 ( A') 3809.6024 ( A')  
Zero-point correction (Hartree): 0.014553

#### NF2H

-----

E(RM052X+HF-M052X/6-311G(d)) (Hartree): -254.92847340  
E(CCSD(T)/Aug-CC-pVTZ) (Hartree): -254.62083502  
E(CCSD/Aug-CC-pVTZ) (Hartree): -254.59327666  
E(MP2/Aug-CC-pVTZ) (Hartree): -254.58732715  
E(MP3/Aug-CC-pVTZ) (Hartree): -254.58648411  
E(RHF/Aug-CC-pVTZ) (Hartree): -253.85251731  
Electronic state : 1-A  
Cartesian coordinates (Angs):  
N -0.000242 0.556774 -0.164948  
F 1.080922 -0.276065 0.024497  
F -1.080785 -0.276146 0.024563  
H 0.000462 1.072472 0.713102  
Rotational constants (GHz): 54.6013700 11.1774400 9.5678200  
Vibrational harmonic frequencies (cm-1):  
544.4043 1005.2252 1084.6903  
1391.1035 1544.7614 3461.7860  
Zero-point correction (Hartree): 0.020576

#### NF2

---

E(UM052X+HF-M052X/6-311G(d)) (Hartree): -254.30519806  
E(CCSD(T)/Aug-CC-pVTZ) (Hartree): -253.99247463  
E(CCSD/Aug-CC-pVTZ) (Hartree): -253.96548109  
E(MP2/Aug-CC-pVTZ) (Hartree): -253.95734430  
E(MP3/Aug-CC-pVTZ) (Hartree): -253.95555789  
E(PMP2/Aug-CC-pVTZ) (Hartree): -253.96027005

E(PMP3/Aug-CC-pVTZ) (Hartree): -253.95726496  
E(PUHF/Aug-CC-pVTZ) (Hartree): -253.27053582  
E(UHF/Aug-CC-pVTZ) (Hartree): -253.26591919 Point group : C2V  
Electronic state : 2-B1  
Cartesian coordinates (Angs):  
N 0.000000 0.000000 0.596577  
F 0.000000 1.046978 -0.232002  
F 0.000000 -1.046978 -0.232002  
Rotational constants (GHz): 71.9416600 12.1337500 10.3826100  
Vibrational harmonic frequencies (cm-1):  
621.2610 1041.9603 1183.0092  
Zero-point correction (Hartree): 0.006484

NF2OH.c

-----

E(RM052X+HF-M052X/6-311G(d)) (Hartree): -330.12975859  
E(CCSD(T)/Aug-CC-pVTZ) (Hartree): -329.72813040  
E(CCSD/Aug-CC-pVTZ) (Hartree): -329.68843133  
E(MP2/Aug-CC-pVTZ) (Hartree): -329.68622080  
E(MP3/Aug-CC-pVTZ) (Hartree): -329.67975483  
E(RHF/Aug-CC-pVTZ) (Hartree): -328.70664964  
Electronic state : 1-A  
Cartesian coordinates (Angs):  
N -0.025767 -0.000039 -0.491773  
F 0.628657 1.063887 0.122038  
F 0.631032 -1.062518 0.122053  
O -1.248900 -0.001363 0.030707  
H -1.165633 -0.001154 0.999934  
Rotational constants (GHz): 10.9194600 10.5574000 5.9938700  
Vibrational harmonic frequencies (cm-1):  
441.5311 538.7836 635.4263  
679.2653 937.8124 964.3002  
1122.6532 1505.3349 3680.7316  
Zero-point correction (Hartree): 0.023934

NF2OH.t

-----

E(RM052X+HF-M052X/6-311G(d)) (Hartree): -330.12595839  
E(CCSD(T)/Aug-CC-pVTZ) (Hartree): -329.72564793  
E(CCSD/Aug-CC-pVTZ) (Hartree): -329.68664466  
E(MP2/Aug-CC-pVTZ) (Hartree): -329.68366569  
E(MP3/Aug-CC-pVTZ) (Hartree): -329.67821587  
E(RHF/Aug-CC-pVTZ) (Hartree): -328.70626499  
Electronic state : 1-A  
Cartesian coordinates (Angs):  
N 0.031417 -0.000003 0.445166  
F -0.653705 1.058481 -0.100072  
F -0.653987 -1.058333 -0.100082  
O 1.208987 -0.000119 -0.223032  
H 1.877415 -0.000353 0.469480  
Rotational constants (GHz): 10.8179700 10.7048700 5.9023400  
Vibrational harmonic frequencies (cm-1):  
334.5987 544.7165 561.4028  
692.3850 991.5110 1005.6389  
1085.5472 1477.2542 3848.7441  
Zero-point correction (Hartree): 0.024016

NF2O

----

E(UM052X+HF-M052X/6-311G(d)) (Hartree): -329.49760098  
E(CCSD(T)/Aug-CC-pVTZ) (Hartree): -329.08580001  
E(CCSD/Aug-CC-pVTZ) (Hartree): -329.04422785  
E(MP2/Aug-CC-pVTZ) (Hartree): -329.04101350  
E(MP3/Aug-CC-pVTZ) (Hartree): -329.02988785  
E(PMP2/Aug-CC-pVTZ) (Hartree): -329.04776967  
E(PMP3/Aug-CC-pVTZ) (Hartree): -329.03398296  
E(PUHF/Aug-CC-pVTZ) (Hartree): -328.09960008  
E(UHF/Aug-CC-pVTZ) (Hartree): -328.09043836 Electronic state : 2-A  
Cartesian coordinates (Angs):  
N -0.000603 0.170417 0.287812  
O -0.003003 1.273956 -0.106060  
F -1.088422 -0.634983 -0.064814  
F 1.091560 -0.629969 -0.064764  
Rotational constants (GHz): 11.7417400 10.8351600 5.8300100  
Vibrational harmonic frequencies (cm-1):  
490.2780 532.3951 683.5391  
837.9813 956.5710 1633.0631  
Zero-point correction (Hartree): 0.011696

NF3

---

E(RM052X+HF-M052X/6-311G(d)) (Hartree): -354.13611028  
E(CCSD(T)/Aug-CC-pVTZ) (Hartree): -353.71361080  
E(CCSD/Aug-CC-pVTZ) (Hartree): -353.67511638  
E(MP2/Aug-CC-pVTZ) (Hartree): -353.67451342  
E(MP3/Aug-CC-pVTZ) (Hartree): -353.66566844  
E(RHF/Aug-CC-pVTZ) (Hartree): -352.68589143 Point group : CS  
Electronic state : 1-A'  
Cartesian coordinates (Angs):  
N 0.338172 0.330159 0.000000  
F -0.939368 0.784832 0.000000  
F 0.338172 -0.520811 1.055057  
F 0.338172 -0.520811 -1.055057  
Rotational constants (GHz): 10.9284500 10.9206100 5.9766700  
Vibrational harmonic frequencies (cm-1):  
535.1475 ( A'') 535.8508 ( A') 707.2625 ( A')  
1022.2475 ( A'') 1023.3765 ( A') 1125.0404 ( A')  
Zero-point correction (Hartree): 0.011274

OF

--

E(UM052X+HF-M052X/6-311G(d)) (Hartree): -174.89297393  
E(CCSD(T)/Aug-CC-pVTZ) (Hartree): -174.68434088  
E(CCSD/Aug-CC-pVTZ) (Hartree): -174.66695811  
E(MP2/Aug-CC-pVTZ) (Hartree): -174.65341848  
E(MP3/Aug-CC-pVTZ) (Hartree): -174.65826542  
E(PMP2/Aug-CC-pVTZ) (Hartree): -174.65655913  
E(PMP3/Aug-CC-pVTZ) (Hartree): -174.66025192  
E(PUHF/Aug-CC-pVTZ) (Hartree): -174.20086437  
E(UHF/Aug-CC-pVTZ) (Hartree): -174.19624969  
Point group : C\*v  
Cartesian coordinates (Angs):  
O 0.000000 0.000000 -0.703703  
F 0.000000 0.000000 0.625513  
Rotational constants (GHz): 0.0000000 32.9391391 32.9391391  
Vibrational harmonic frequencies (cm-1):  
1178.1511 ( SG)  
Zero-point correction (Hartree): 0.002684

OH

--

E(UM052X+HF-M052X/6-311G(d)) (Hartree): -75.73281510  
E(CCSD(T)/Aug-CC-pVTZ) (Hartree): -75.64557729  
E(CCSD/Aug-CC-pVTZ) (Hartree): -75.63969723  
E(MP2/Aug-CC-pVTZ) (Hartree): -75.62633692  
E(MP3/Aug-CC-pVTZ) (Hartree): -75.63790561  
E(PMP2/Aug-CC-pVTZ) (Hartree): -75.62832298  
E(PMP3/Aug-CC-pVTZ) (Hartree): -75.63904465  
E(PUHF/Aug-CC-pVTZ) (Hartree): -75.42497835  
E(UHF/Aug-CC-pVTZ) (Hartree): -75.42162889  
Point group : C\*v  
Cartesian coordinates (Angs):  
O 0.000000 0.000000 0.107791  
H 0.000000 0.000000 -0.862324  
Rotational constants (GHz): 0.0000000 566.3995836 566.3995836  
Vibrational harmonic frequencies (cm-1):  
3747.9405 ( SG)  
Zero-point correction (Hartree): 0.008538

TS\_F2NOH\_F\_F2NO\_HF

-----

E(UM052X+HF-M052X/6-311G(d)) (Hartree): -429.87101498  
E(CCSD(T)/Aug-CC-pVTZ) (Hartree): -429.35169816  
E(CCSD/Aug-CC-pVTZ) (Hartree): -429.29931521  
E(MP2/Aug-CC-pVTZ) (Hartree): -429.27122990  
E(MP3/Aug-CC-pVTZ) (Hartree): -429.26878067  
E(PMP2/Aug-CC-pVTZ) (Hartree): -429.27520679  
E(PMP3/Aug-CC-pVTZ) (Hartree): -429.27134988  
E(PUHF/Aug-CC-pVTZ) (Hartree): -428.06018236  
E(UHF/Aug-CC-pVTZ) (Hartree): -428.05388399  
Electronic state : 2-A  
Cartesian coordinates (Angs):  
N 0.211134 -0.000081 -0.031017  
F -1.756827 0.000444 -0.535311  
F 0.999128 -1.061767 -0.269015  
F 0.996971 1.063896 -0.265656

```
O      -0.290183      -0.002566      1.137942
H      -1.309918      -0.002055      0.743426
Rotational constants (GHz):   6.9901400   3.9005900   3.5314200
Vibrational harmonic frequencies (cm-1):
-1572.1812                    62.6270                    267.6356
 550.4722                     551.9530                    625.7727
 819.7488                      895.9514                   1080.8382
1151.5418                     1344.6437                   2211.9294
Zero-point correction (Hartree): 0.021786
```

TS\_F\_NF2OH\_SN2

```
-----
E(UM052X+HF-M052X/6-311G(d)) (Hartree): -429.85546486
E(CCSD(T)/Aug-CC-pVTZ) (Hartree): -429.34221416
E(CCSD/Aug-CC-pVTZ) (Hartree): -429.28975396
E(MP2/Aug-CC-pVTZ) (Hartree): -429.26412915
E(MP3/Aug-CC-pVTZ) (Hartree): -429.26297364
E(PMP2/Aug-CC-pVTZ) (Hartree): -429.28648730
E(PMP3/Aug-CC-pVTZ) (Hartree): -429.27922906
E(PUHF/Aug-CC-pVTZ) (Hartree): -428.07533431
E(UHF/Aug-CC-pVTZ) (Hartree): -428.04897510
Electronic state : 2-A
```

```
Cartesian coordinates (Angs):
N      -0.017132      0.002461      -0.133133
F      -0.018494     -1.042136      0.712521
F       1.458115     -0.112673     -0.652554
F      -1.564544      0.015230     -0.549574
O       0.034400      1.123706      0.567798
H       0.969037      1.249339      0.796017
Rotational constants (GHz):   7.0164700   4.3129900   3.8673000
Vibrational harmonic frequencies (cm-1):
-906.6083                    274.3502                    355.2952
 384.8621                     452.5228                    500.9832
 613.9474                     680.7635                   1042.1504
1143.9324                     1478.0477                   3735.5817
Zero-point correction (Hartree): 0.024291
```

TS\_F\_ONF2H\_SN2

```
-----
E(UM052X+HF-M/6-311G(d)) (Hartree): -429.79937083
E(CCSD(T)/Aug-CC-pVTZ) (Hartree): -429.29124875
E(CCSD/Aug-CC-pVTZ) (Hartree): -429.23041135
E(MP2/Aug-CC-pVTZ) (Hartree): -429.23287845
E(MP3/Aug-CC-pVTZ) (Hartree): -429.20914226
E(PMP2/Aug-CC-pVTZ) (Hartree): -429.24057606
E(PMP3/Aug-CC-pVTZ) (Hartree): -429.21437743
E(PUHF/Aug-CC-pVTZ) (Hartree): -427.98400134
E(UHF/Aug-CC-pVTZ) (Hartree): -427.97419424
Point group : CS
```

```
Electronic state : 2-A''
Cartesian coordinates (Angs):
N       0.166455      0.117334      0.000000
F       0.285698      0.094433      1.675657
F       0.285698      0.094433     -1.675657
H       0.929752      0.788536      0.000000
F      -1.058120      0.648738      0.000000
O       0.285698     -1.143538      0.000000
Rotational constants (GHz):   8.8686700   4.2513200   3.3361500
Vibrational harmonic frequencies (cm-1):
-1164.9906 ( A'')           276.6178 ( A')           374.2060 ( A')
 410.6644 ( A')           499.7467 ( A'')           516.5802 ( A'')
 650.1352 ( A')           1074.7802 ( A')           1189.5188 ( A')
1235.1593 ( A'')           1424.2229 ( A')           3515.4574 ( A')
Zero-point correction (Hartree): 0.025441
```

TS\_HNF2O\_F\_NF2O\_HF

```
-----
E(UM052X+HF-M052X/6-311G(d)) (Hartree): -429.86207452
E(CCSD(T)/Aug-CC-pVTZ) (Hartree): -429.34181279
E(CCSD/Aug-CC-pVTZ) (Hartree): -429.28931373
E(MP2/Aug-CC-pVTZ) (Hartree): -429.28672203
E(MP3/Aug-CC-pVTZ) (Hartree): -429.27214648
E(PMP2/Aug-CC-pVTZ) (Hartree): -429.28898590
E(PMP3/Aug-CC-pVTZ) (Hartree): -429.27370696
E(PUHF/Aug-CC-pVTZ) (Hartree): -428.06511683
E(UHF/Aug-CC-pVTZ) (Hartree): -428.06143393
Electronic state : 2-A
Cartesian coordinates (Angs):
```

|   |           |           |           |
|---|-----------|-----------|-----------|
| N | -0.374895 | -0.005649 | 0.217123  |
| F | -0.472959 | -1.079673 | -0.733127 |
| F | -0.510095 | 1.115166  | -0.672825 |
| O | -1.136868 | -0.042513 | 1.106634  |
| H | 0.665670  | 0.006997  | 0.399823  |
| F | 2.211225  | 0.005912  | 0.208980  |

Rotational constants (GHz): 5.8891900 3.0593600 2.9557300  
Vibrational harmonic frequencies (cm-1):  
-271.1465 21.1438 66.6452  
468.3943 488.6090 655.6259  
856.1235 935.5989 1287.7532  
1419.8302 1690.3067 2500.8820  
Zero-point correction (Hartree): 0.023672

TS\_NF2\_HOF

-----  
E(UM052X+HF-M052X/6-311G(d)) (Hartree): -429.81258934  
E(CCSD(T)/Aug-CC-pVTZ) (Hartree): -429.30522407  
E(CCSD/Aug-CC-pVTZ) (Hartree): -429.25469792  
E(MP2/Aug-CC-pVTZ) (Hartree): -429.20520664  
E(MP3/Aug-CC-pVTZ) (Hartree): -429.21988850  
E(PMP2/Aug-CC-pVTZ) (Hartree): -429.24077288  
E(PMP3/Aug-CC-pVTZ) (Hartree): -429.25164911  
E(PUHF/Aug-CC-pVTZ) (Hartree): -428.09748993  
E(UHF/Aug-CC-pVTZ) (Hartree): -428.05971477  
Electronic state : 2-A  
Cartesian coordinates (Angs):  
N -0.975724 0.007783 0.519763  
F -1.313253 1.044981 -0.232865  
F -1.331312 -1.036553 -0.212140  
F 0.845819 -0.016523 0.187646  
O 2.528343 -0.027866 -0.245956  
H 2.792032 0.241298 0.645540  
Rotational constants (GHz): 10.3261300 2.3958000 2.0672500  
Vibrational harmonic frequencies (cm-1):  
-831.1030 115.2118 137.1432  
193.9710 236.5942 291.4151  
461.8312 637.4653 949.1030  
1069.5808 1167.1336 3797.9310  
Zero-point correction (Hartree): 0.020634

TS\_NF2\_HOF\_NF2H\_OF

-----  
E(UM052X+HF-M052X/6-311G(d)) (Hartree): -429.80974943  
E(CCSD(T)/Aug-CC-pVTZ) (Hartree): -429.29254266  
E(CCSD/Aug-CC-pVTZ) (Hartree): -429.24217965  
E(MP2/Aug-CC-pVTZ) (Hartree): -429.21994398  
E(MP3/Aug-CC-pVTZ) (Hartree): -429.22117151  
E(PMP2/Aug-CC-pVTZ) (Hartree): -429.22668634  
E(PMP3/Aug-CC-pVTZ) (Hartree): -429.22563457  
E(PUHF/Aug-CC-pVTZ) (Hartree): -428.01566172  
E(UHF/Aug-CC-pVTZ) (Hartree): -428.00664489  
Electronic state : 2-A  
Cartesian coordinates (Angs):  
N -0.985703 -0.061996 0.568059  
F -0.969329 1.120974 -0.083920  
F -1.168692 -0.969182 -0.417446  
H 0.096858 -0.202257 0.819600  
O 1.448875 -0.277852 0.657838  
F 1.606029 0.165879 -0.616270  
Rotational constants (GHz): 7.6226500 3.1058300 2.7530900  
Vibrational harmonic frequencies (cm-1):  
-1554.3146 46.1631 119.2449  
148.9786 356.6287 588.8794  
835.8940 1052.0414 1107.3703  
1183.6253 1394.8232 1557.4654  
Zero-point correction (Hartree): 0.019116

TS\_NF2OH\_F

-----  
E(UM052X+HF-M052X/6-311G(d)) (Hartree): -429.83721464  
E(CCSD(T)/Aug-CC-pVTZ) (Hartree): -429.32733992  
E(CCSD/Aug-CC-pVTZ) (Hartree): -429.27514491  
E(MP2/Aug-CC-pVTZ) (Hartree): -429.24550740  
E(MP3/Aug-CC-pVTZ) (Hartree): -429.24703521  
E(PMP2/Aug-CC-pVTZ) (Hartree): -429.27085484  
E(PMP3/Aug-CC-pVTZ) (Hartree): -429.26616957



E(PUHF/Aug-CC-pVTZ) (Hartree): -428.06826334  
E(UHF/Aug-CC-pVTZ) (Hartree): -428.03897128  
Electronic state : 2-A  
Cartesian coordinates (Angs):  
N 0.009083 -0.007055 0.133646  
F 0.090323 -1.012034 -0.735158  
F 1.480106 -0.030376 0.691103  
F 0.072459 1.082623 -0.612564  
O -1.648373 0.018770 0.459419  
H -1.662586 -0.462697 1.298702  
Rotational constants (GHz): 6.8732100 4.2214400 3.8820500  
Vibrational harmonic frequencies (cm-1):  
-972.3880 232.0371 270.5670  
358.8975 413.5046 455.4055  
614.7887 656.0926 1050.3536  
1088.9267 1191.7182 3796.4563  
Zero-point correction (Hartree): 0.023075

TS\_NF3O\_H\_NF2\_HF  
-----

E(UM052X+HF-M052X/6-311G(d)) (Hartree): -429.79865165  
E(CCSD(T)/Aug-CC-pVTZ) (Hartree): -429.28325212  
E(CCSD/Aug-CC-pVTZ) (Hartree): -429.22485139  
E(MP2/Aug-CC-pVTZ) (Hartree): -429.22409215  
E(MP3/Aug-CC-pVTZ) (Hartree): -429.19805622  
E(PMP2/Aug-CC-pVTZ) (Hartree): -429.24232949  
E(PMP3/Aug-CC-pVTZ) (Hartree): -429.21185937  
E(PUHF/Aug-CC-pVTZ) (Hartree): -427.98818208  
E(UHF/Aug-CC-pVTZ) (Hartree): -427.96754590  
Electronic state : 2-A  
Cartesian coordinates (Angs):  
N 0.197339 -0.000001 0.173461  
F 0.484391 -1.082385 -0.653121  
F 0.484393 1.082388 -0.653114  
F -1.367060 0.000006 0.076989  
O 0.642473 -0.000006 1.233725  
H -2.936670 -0.000024 -0.020808  
Rotational constants (GHz): 5.9069900 4.9909500 4.8253500  
Vibrational harmonic frequencies (cm-1):  
-1345.7890 270.5865 284.7026  
414.2378 414.7659 556.2369  
565.2149 585.5773 817.5070  
934.0660 1004.9440 1838.7949  
Zero-point correction (Hartree): 0.017511

TS\_NF3O\_H\_NF2OHc\_F  
-----

E(UM052X+HF-M052X/6-311G(d)) (Hartree): -429.78274132  
E(CCSD(T)/Aug-CC-pVTZ) (Hartree): -429.26712493  
E(CCSD/Aug-CC-pVTZ) (Hartree): -429.20990223  
E(MP2/Aug-CC-pVTZ) (Hartree): -429.19709065  
E(MP3/Aug-CC-pVTZ) (Hartree): -429.18070738  
E(PMP2/Aug-CC-pVTZ) (Hartree): -429.22038060  
E(PMP3/Aug-CC-pVTZ) (Hartree): -429.19893285  
E(PUHF/Aug-CC-pVTZ) (Hartree): -427.98198220  
E(UHF/Aug-CC-pVTZ) (Hartree): -427.95597309  
Electronic state : 2-A  
Cartesian coordinates (Angs):  
N -0.106182 -0.000100 0.097632  
F -0.137262 1.068920 -0.742209  
F 1.432116 -0.001087 0.500342  
O -0.914098 -0.001224 0.962434  
F -0.138047 -1.066656 -0.745289  
H -2.355210 -0.000105 0.501504  
Rotational constants (GHz): 6.0152300 5.0735000 4.9430300  
Vibrational harmonic frequencies (cm-1):  
-1732.8639 251.9571 338.3179  
366.6925 489.4827 577.9480  
630.1111 647.5869 873.9063  
962.2332 1065.2496 1630.5395  
Zero-point correction (Hartree): 0.017847

TS\_NF3O\_H\_NF2O\_HF  
-----

E(UM052X+HF-M052X/6-311G(d)) (Hartree): -429.79865165  
E(CCSD(T)/Aug-CC-pVTZ) (Hartree): -429.28325212  
E(CCSD/Aug-CC-pVTZ) (Hartree): -429.22485139  
E(MP2/Aug-CC-pVTZ) (Hartree): -429.22409215

E(MP3/Aug-CC-pVTZ) (Hartree): -429.19805622  
E(PMP2/Aug-CC-pVTZ) (Hartree): -429.24232949  
E(PMP3/Aug-CC-pVTZ) (Hartree): -429.21185937  
E(PUHF/Aug-CC-pVTZ) (Hartree): -427.98818208  
E(UHF/Aug-CC-pVTZ) (Hartree): -427.96754590  
Electronic state : 2-A  
Cartesian coordinates (Angs):  
N 0.197339 -0.000001 0.173461  
F 0.484391 -1.082385 -0.653121  
F 0.484393 1.082388 -0.653114  
F -1.367060 0.000006 0.076989  
O 0.642473 -0.000006 1.233725  
H -2.936670 -0.000024 -0.020808  
Rotational constants (GHz): 5.9069900 4.9909500 4.8253500  
Vibrational harmonic frequencies (cm-1):  
-1345.7890 270.5865 284.7026  
414.2378 414.7659 556.2369  
565.2149 585.5773 817.5070  
934.0660 1004.9440 1838.7949  
Zero-point correction (Hartree): 0.017511

TS\_NF3O\_H\_NF2Oht\_F  
-----

E(UM052X+HF-M052X/6-311G(d)) (Hartree): -429.78081258  
E(CCSD(T)/Aug-CC-pVTZ) (Hartree): -429.28325212  
E(CCSD/Aug-CC-pVTZ) (Hartree): -429.22485139  
E(MP2/Aug-CC-pVTZ) (Hartree): -429.22409215  
E(MP3/Aug-CC-pVTZ) (Hartree): -429.19805622  
E(PMP2/Aug-CC-pVTZ) (Hartree): -429.24232949  
E(PMP3/Aug-CC-pVTZ) (Hartree): -429.21185937  
E(PUHF/Aug-CC-pVTZ) (Hartree): -427.98818208  
E(UHF/Aug-CC-pVTZ) (Hartree): -427.96754590  
Electronic state : 2-A  
Cartesian coordinates (Angs):  
N 0.074591 0.169496 0.000001  
F 0.761648 -0.283420 -1.075066  
F 0.761644 -0.283429 1.075067  
O -0.268730 1.296601 0.000004  
F -1.145821 -0.862650 -0.000005  
H -1.769532 1.306204 0.000002  
Rotational constants (GHz): 5.6959400 5.2346700 5.1865700  
Vibrational harmonic frequencies (cm-1):  
-1781.1211 332.9265 378.7060  
411.6675 501.0510 570.6919  
627.6190 663.4499 827.1432  
1047.5860 1100.7017 1691.2109  
Zero-point correction (Hartree): 0.018573

TS\_ONF2H\_F  
-----

E(UM052X+HF-M/6-311G(d)) (Hartree): -429.75060897  
E(CCSD(T)/Aug-CC-pVTZ) (Hartree): -429.23290301  
E(CCSD/Aug-CC-pVTZ) (Hartree): -429.16185385  
E(MP2/Aug-CC-pVTZ) (Hartree): -429.16386900  
E(MP3/Aug-CC-pVTZ) (Hartree): -429.14100391  
E(PMP2/Aug-CC-pVTZ) (Hartree): -429.16746234  
E(PMP3/Aug-CC-pVTZ) (Hartree): -429.14383014  
E(PUHF/Aug-CC-pVTZ) (Hartree): -427.88640680  
E(UHF/Aug-CC-pVTZ) (Hartree): -427.88242605  
Point group : CS  
Electronic state : 2-A"  
Cartesian coordinates (Angs):  
N 0.160659 0.051128 0.000000  
F -0.568051 0.394717 1.063320  
F -0.568051 0.394717 -1.063320  
H 0.189673 -1.037741 0.000000  
F 1.495005 1.323120 0.000000  
O -0.568051 -2.291642 0.000000  
Rotational constants (GHz): 6.6468900 2.7396300 2.6002300  
Vibrational harmonic frequencies (cm-1):  
-1103.2694 ( A') 90.8067 ( A') 109.4204 ( A")  
200.2473 ( A") 215.6277 ( A') 344.3402 ( A')  
589.4694 ( A') 908.3473 ( A') 1120.2912 ( A")  
1142.1046 ( A') 1515.7815 ( A") 1721.0820 ( A')  
Zero-point correction (Hartree): 0.018129

## Removal of the potent greenhouse gas $\text{NF}_3$ by reactions with the atmospheric oxidants $\text{O}(^1\text{D})$ , OH and $\text{O}_3$ .

### Supplemental info. #2 – correlation of $\text{O}(^1\text{D})$ rate constants with ionisation energy.

Terry J. Dillon<sup>\*</sup>, Luc Vereecken, Abraham Horowitz, Victor Khamaganov, John N. Crowley and Jos Lelieveld

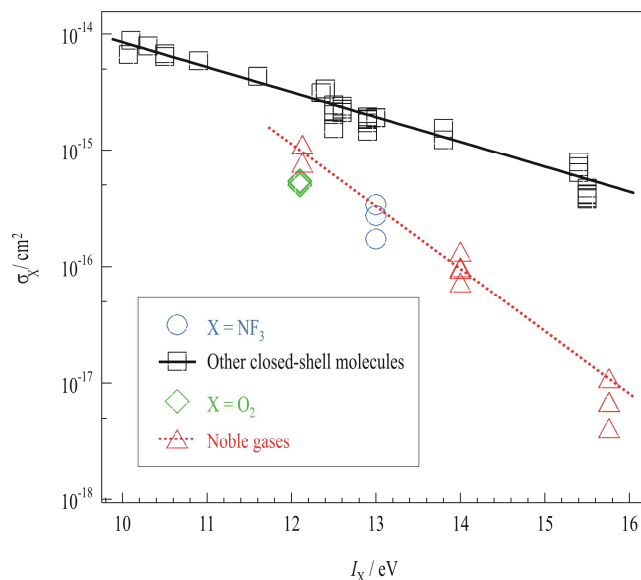

**Figure 1 supplemental.**

Displays plots of per-collision rate constants against ionisation potential  $I_X$  of collider X for reactions of the type  $\text{O}(^1\text{D}) + \text{X} \rightarrow (\text{products})$ . To compare the  $\text{O}(^1\text{D})$  destruction efficiency of various collision partners, thermally averaged reaction cross-sections,  $\sigma_X$ , were calculated using expression (S1)

$$\sigma_X = k_X(298 \text{ K}) / \langle c \rangle \quad (\text{S1})$$

where  $\langle c \rangle$  is the mean velocity of the  $\text{O}(^1\text{D}) - \text{X}$  collision (from collision theory). The black squares depict literature data for closed-shell molecules (not atoms), with the values already used in <sup>1-2</sup> augmented by subsequently published rate coefficient data for  $\text{X} = \text{CH}_4$ ;<sup>3</sup>  $\text{N}_2\text{O}$ ;<sup>4,5</sup>  $\text{N}_2$  from this work and <sup>5</sup>;  $\text{H}_2\text{O}$  and  $\text{H}_2$ ;<sup>6</sup>  $\text{SO}_2\text{F}_2$ ;<sup>5,7</sup> and  $\text{CS}_2$  and  $\text{SO}_2$ .<sup>7</sup> The solid black line describes an unweighted fit to yield  $\sigma_X = 1.20 \times 10^{-12} \exp\{-0.50 I_X\} \text{ cm}^2$ . This empirical relationship may be used in conjunction with a literature value for  $I_{\text{NF}_3} = 13.0 \text{ eV}$ <sup>8</sup> to calculate a predicted  $k_2 \approx 1.3 \times 10^{-10} \text{ cm}^3 \text{ molecule}^{-1} \text{ s}^{-1}$ , a factor of 5 or so larger than the measurements from <sup>7</sup> and in this work. Experimentally derived data for  $\text{NF}_3$  (the blue circles) however lies on the correlation line derived from  $\text{O}(^1\text{D}) + \text{noble gas}$  data (red triangles, *nb.*  $\text{X} = \text{Ne}$  off-scale at  $I = 21.56 \text{ eV}$ ,  $\sigma = 5.97 \times 10^{-20} \text{ cm}^2$ ). An unweighted fit yields  $\sigma_X = 3.05 \times 10^{-9} \exp\{-1.23 I_X\} \text{ cm}^2$  (the red dotted line). Note this relationship may be skewed by experimentally derived rate coefficients that were essentially upper-limit values, for this reason no  $\text{X} = \text{He}$  data was used.

- 1 M. A. Blitz, T. J. Dillon, D. E. Heard, M. J. Pilling and I. D. Trought, *Phys. Chem. Chem. Phys.* 2004, **6**, 2162-2171.
- 2 T. J. Dillon, A. Horowitz and J. N. Crowley, *Chem. Phys. Lett.* 2007, **14**, 12-16.
- 3 S. Vranckx, J. Peeters and S. Carl, *Phys. Chem. Chem. Phys.* 2008, **10**, 5714-5722.
- 4 S. Vranckx, J. Peeters and S. A. Carl, *Atmos. Chem. Phys.* 2008, **8**, 6261-6272.

- 5 T. J. Dillon, L. Horowitz and J. N. Crowley, *Atmospheric Chemistry and Physics* 2008, **8**, 1547-1557.
- 6 S. Vranckx, J. Peeters and S. Carl, *Phys. Chem. Chem. Phys.* 2010, **12**, 9213-9221.
- 7 Z. J. Zhao, P. L. Laine, J. M. Nicovich and P. H. Wine, *Proc. Natl. Acad. Sci. U. S. A.* 2010, **107**, 6610-6615.
- 8 *CRC Handbook of Chemistry and Physics*; R. C. Weast, Ed.; CRC Press, Boca Raton, Florida, 1985.
